# Supplementary material
Source: PubMed Central journal article supplement (PMC4406348)
Supplement: NIHMS666482-supplement-Figure.pdf [file NIHMS666482-supplement-Figure.pdf]

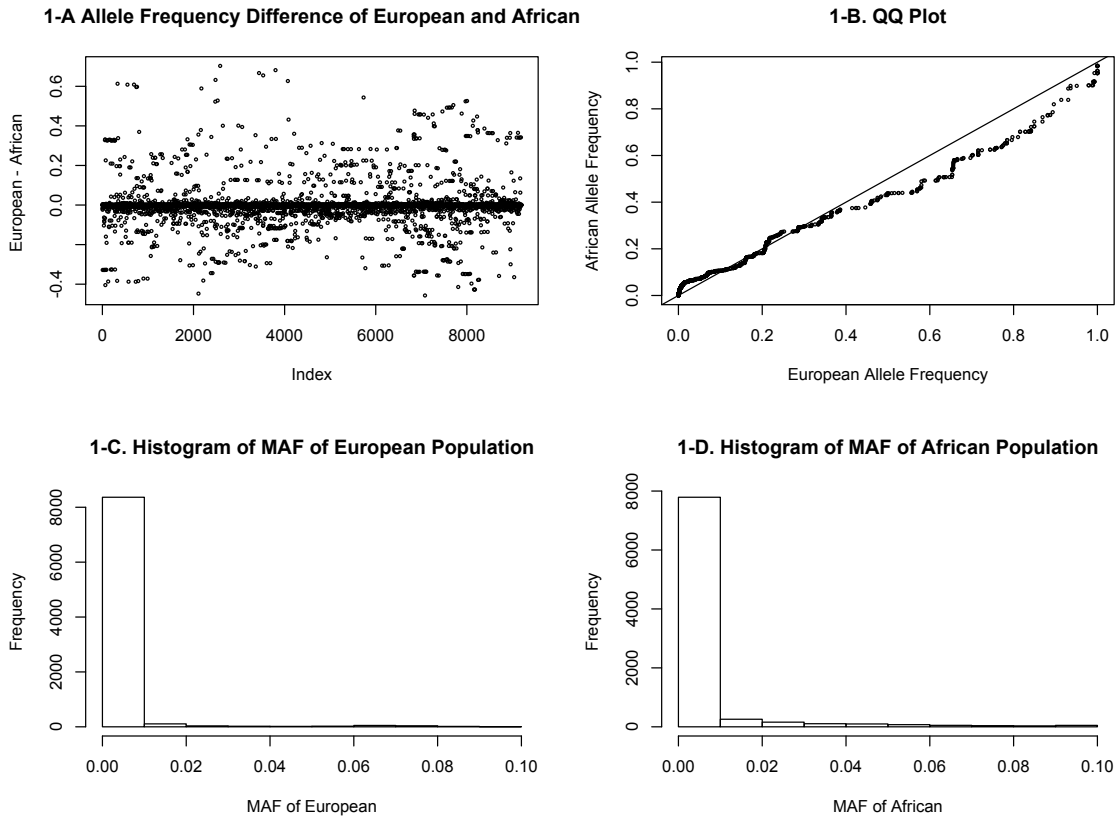

Supplementary Figure 1: Allele frequency distribution in simulated European and African populations. 1-A: Allele frequency difference of European versus African populations; 1-B: QQ plot of African allele frequencies versus European allele frequencies; 1-C: Histogram of minor allele frequency in European population; 1-D: Histogram of minor allele frequency in African population.
