# Supplementary material
Source: PubMed Central journal article supplement (PMC4406348)
Supplement: NIHMS666482-supplement-Table.pdf [file NIHMS666482-supplement-Table.pdf]

1kb Region

|         | >0  | 0    |
|---------|-----|------|
| Case    | 65  | 935  |
| Control | 60  | 940  |
| Total   | 125 | 1875 |

Overall OR: 1.089

|         | >0 | 0   |
|---------|----|-----|
| Case    | 5  | 95  |
| Control | 28 | 472 |
| Total   | 33 | 567 |

European OR: 0.887

|         | >0 | 0    |
|---------|----|------|
| Case    | 59 | 841  |
| Control | 32 | 468  |
| Total   | 91 | 1309 |

African OR: 1.026

10kb Region

|         | >0  | 0    |
|---------|-----|------|
| Case    | 450 | 550  |
| Control | 432 | 568  |
| Total   | 882 | 1118 |

Overall OR: 1.076

|         | >0  | 0   |
|---------|-----|-----|
| Case    | 42  | 58  |
| Control | 210 | 290 |
| Total   | 252 | 348 |

European OR: 1

|         | >0  | 0   |
|---------|-----|-----|
| Case    | 408 | 492 |
| Control | 222 | 278 |
| Total   | 630 | 770 |

African OR: 1.038

50kb Region

|         | >0   | 0   |
|---------|------|-----|
| Case    | 927  | 73  |
| Control | 924  | 76  |
| Total   | 1851 | 149 |

Overall OR: 1.044

|         | >0  | 0  |
|---------|-----|----|
| Case    | 92  | 8  |
| Control | 462 | 38 |
| Total   | 554 | 46 |

European OR: 0.946

|         | >0   | 0   |
|---------|------|-----|
| Case    | 835  | 65  |
| Control | 462  | 38  |
| Total   | 1297 | 103 |

African OR: 1.057

Supplementary Table 1: 2x2 tables showing counts of the CMC variable (>0 variants vs. 0 variants) for different region sizes. Left column: All individuals. Center column: European only. Right column: African only. Numbers are averaged across 500 simulations.
